# Supplementary material
Source: publisher figshare collection journal article supplement (https://karger.figshare.com/articles/dataset/_/5127430)

Z-Scores compared to normative data of healthy controls

Overall

Attention

WM

Fluency

ExFunc

Memory

VS

Cognitive Domains

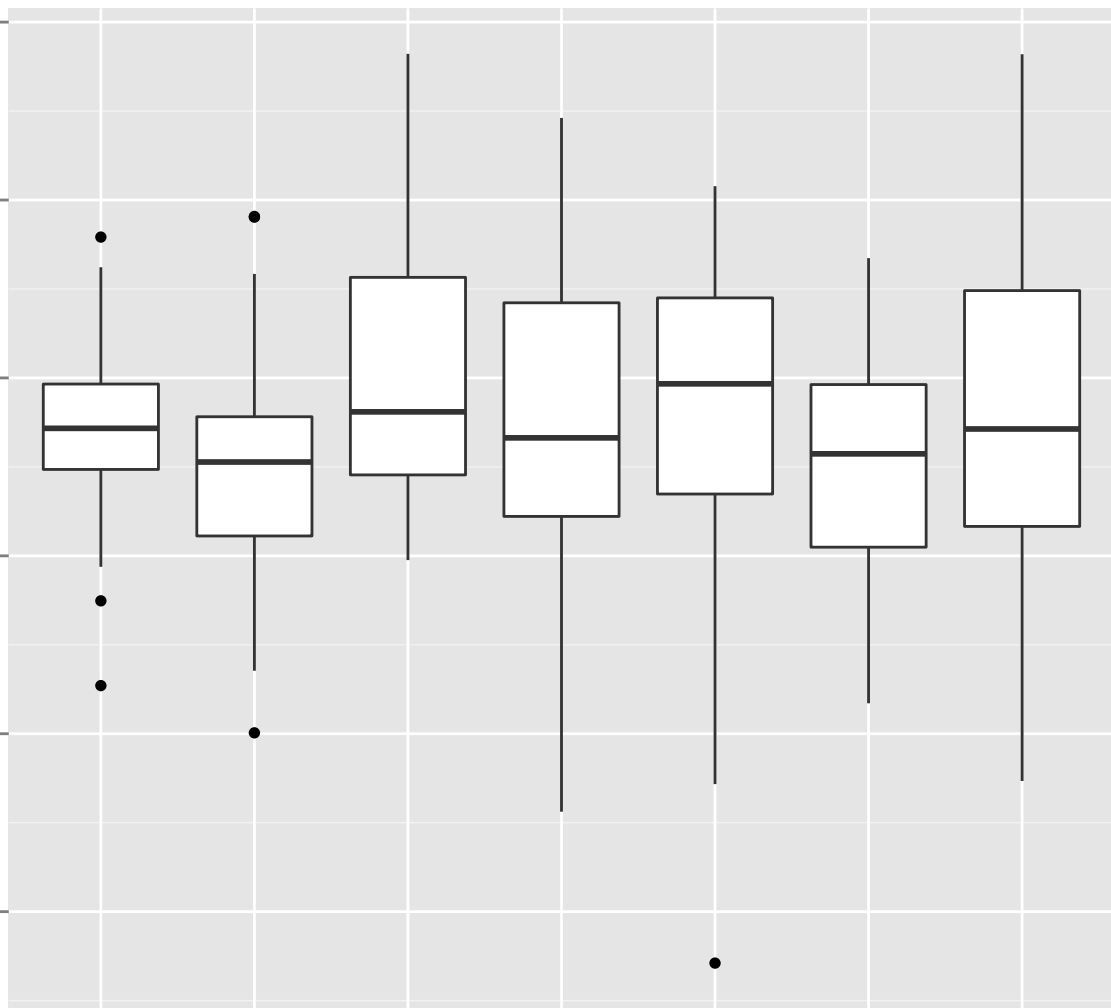

Supplement: Supplementary file 2 [file 1]
