# Supplementary material
Source: publisher figshare collection journal article supplement (https://karger.figshare.com/articles/dataset/_/5127430)

Correlation (regression + conf. int.) of EEG Median Frequency with Cognitive Domains

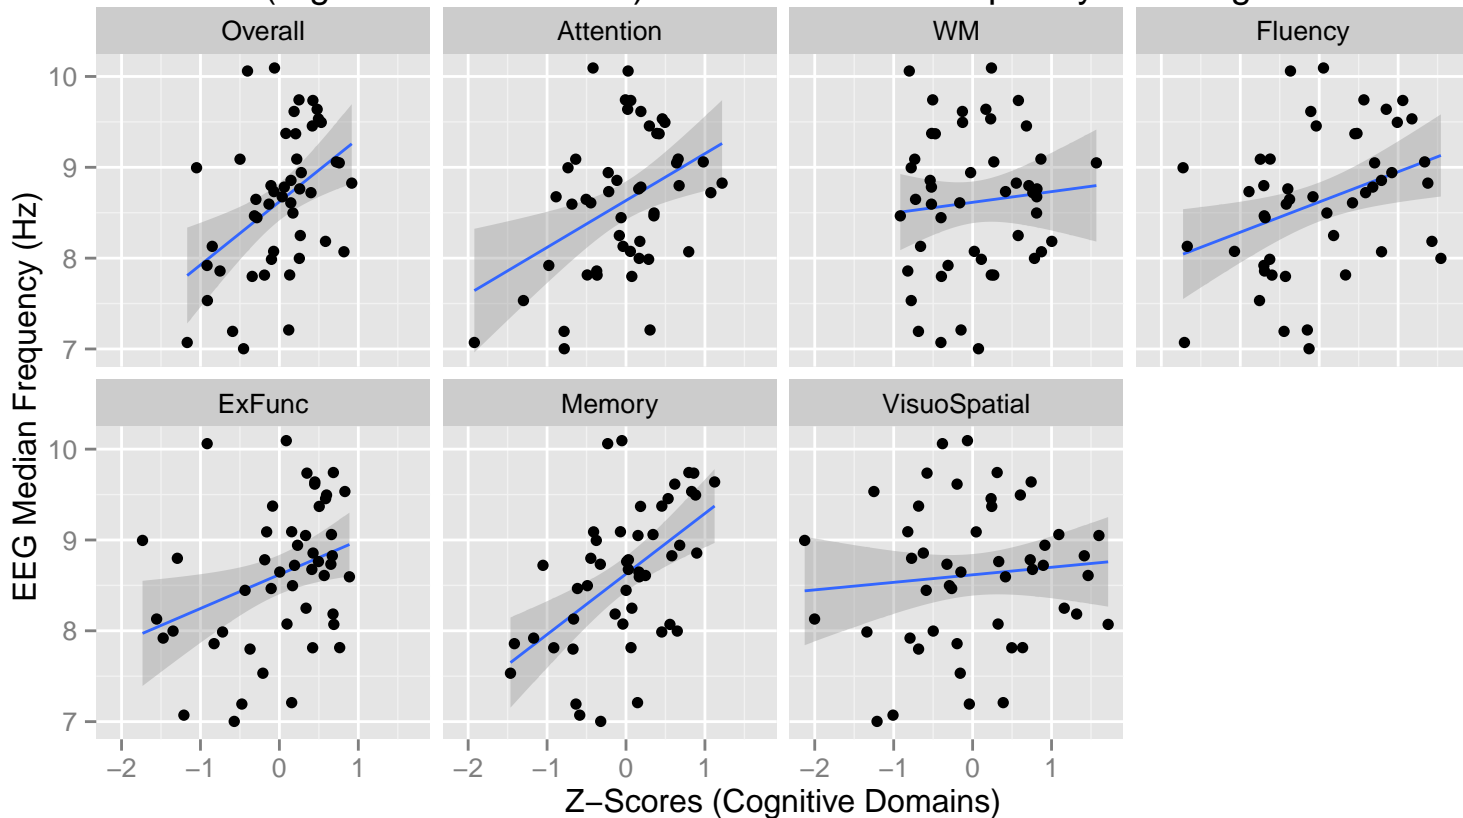

Supplement: Supplementary file 1 [file 1]
